# Supplementary material
Source: PubMed Central journal article supplement (PMC3697511)

1 **Engineering the soil bacterium *Pseudomonas putida* for arsenic removal**

2

3 **Jian Chen<sup>1,2</sup>, Jie Qin<sup>1</sup>, Yong-Guan Zhu<sup>2,3</sup>, Víctor de Lorenzo<sup>4</sup> and Barry P. Rosen<sup>1\*</sup>**

4 <sup>1</sup>Department of Cellular Biology and Pharmacology, Florida International University, Herbert  
5 Wertheim College of Medicine, Miami, FL 33199, USA

6 <sup>2</sup>State Key Lab of Regional and Urban Ecology, Research Center for Eco-environmental  
7 Sciences, Chinese Academy of Sciences, Beijing 100085, China

8 <sup>3</sup>Key Lab of Urban Environment and Health, Institute of Urban Environment, Chinese  
9 Academy of Sciences, Xiamen 361021, People's Republic of China

10 <sup>4</sup>Centro Nacional de Biotecnología-CSIC, Campus UAM-Cantoblanco, Madrid 28049, Spain

11

12 \*Correspondence: Barry P. Rosen, Florida International University Herbert Wertheim College  
13 of Medicine, 11200 SW 8th Street, Miami, FL 33199 Tel: (+1) 305-348-0657, Fax: (+1)  
14 305-348-0651, Email: [brosen@fiu.edu](mailto:brosen@fiu.edu)

15 **Supplemental materials:**

16

17 **Abbreviations:** polymerase chain reaction, PCR; sodium dodecyl sulfate polyacrylamide  
18 gel electrophoresis (SDS-PAGE); high pressure liquid chromatography (HPLC); inductively  
19 coupled plasma mass spectroscopy (ICP-MS).

20

21 **Supplemental Figure Legends:**

22 Supplemental Fig. 1S. **Methylation of As(III) by purified CrArsM.** **A:** Transformation of  
23 10  $\mu$ M As(III) into soluble methylated species was determined by high pressure liquid  
24 chromatography (HPLC) coupled to inductively coupled mass spectroscopy (ICP-MS) using a  
25 C18 reverse phase column after incubation for various times with 1  $\mu$ M purified CrArsM.  
26 Curve 1, standards. Curve 2: 0 time; Curve 3: 7 h; Curve 4: 14 h. **B:** Production of  
27 volatile species determined by anion exchange HPLC-ICP-MS analysis. Curve 1, 0 time;  
28 Curve 2: 7 h; Curve 3: 14 h.

29

30 Supplemental Fig. 2S. **Construction of plasmid pBAM1-P<sub>km</sub>-CrArsM.** The gene for CrArsM  
31 with a C-terminal six-histidine tag was cloned from a *C reinhardtii* cDNA library using forward  
32 primer *arsM-F* 5'-GGAATTCCCATATGGTGGAGCCGGCTTCC ATCGCGGAGCTT-3' (*Nde*I  
33 site underlined) and reverse primer *arsM-R* 5'-CCGCTCGAGTTAATG  
34 ATGATGATGATGATGGCAGCAGGCGCCGCGGGG-3' (*Xho*I site underlined). The  
35 polymerase chain reaction (PCR) fragment was gel purified and cloned into vector plasmid  
36 pET28a vector with the indicated restriction enzymes, generating plasmid pET28a-CrArsM.

37 The kanamycin promoter was cloned from pBAM1 vector using forward primer  
38 5'-GAAGATCTTGTCTC TTATACACATCTGACG-3' (*Bgl*II site underlined) and reverse primer  
39 5'-GGAATTCCATATGAA CACCCCT TGTATTAC-3' (*Nde*I site underlined). The T7 promoter  
40 in pET28a-CrArsM was replaced with the kanamycin promoter, generating plasmid  
41 pET28a-P<sub>km</sub>-CrArsM. Finally, a fragment contained the kanamycin promoter and *arsM* was  
42 excised by digestion with *Bgl*II and *Xho*I and ligated into vector plasmid pBAM1 vector that  
43 had been digested with *Bam*HI and *Sal*I, generating plasmid pBAM1-P<sub>km</sub>-CrArsM.  
44 Functional elements of the plasmid include relevant restriction sites, transposase (*tnpA*),  
45 origin of replication (R6K), the origin of transfer region (*oriT*), mosaic element O (ME-O), and  
46 mosaic element I (ME-I), as shown.

47

48 Supplemental Fig. 3S. **Purification of CrArsM from *E. coli*.** A culture of *E. coli* BL21(DE3)  
49 pET28a-CrArsM was induced overnight with 0.3 mM isopropyl  $\beta$ -D-1-thiogalactopyranoside  
50 and lysed by a single passage through a French pressure cell. Following high speed  
51 centrifugation, the cytoplasmic solution was chromatographed on a Ni-NTA column, and the  
52 fractions analyzed by sodium dodecyl sulfate polyacrylamide gel electrophoresis (SDS-PAGE)  
53 stained with Coomassie Blue. Lane 1: Standard protein markers. Lane 2-8: Successive  
54 column fractions eluted with an imidazole gradient. Lane 9, Cells of *E. coli* BL21(DE3)  
55 pET28a-CrArsM without induction. Lane 10, Cells induced with 0.3 mM isopropyl  
56  $\beta$ -D-1-thiogalactopyranoside.

57

58 Supplemental Fig. 4S. **Immunoblot detection of CrArsM.** Cultures of both *E. coli*

59 BL21(DE3) pET28a-CrArsM induced with 0.3 mM isopropyl  $\beta$ -D-1-thiogalactopyranoside and  
60 *P. putida* pBAM1-Pkm-CrArsM were grown for 6 h in LB medium, centrifuged and suspended  
61 in 1/10 the original volume of SDS sample gel buffer and boiled for 5 m. Portions (5  $\mu$ l) were  
62 separated by SDS-PAGE on a 12% polyacrylamide gel, transferred to a nitrocellulose  
63 membrane and electrophoresed at 25 V overnight. After transfer, the membrane was  
64 blocked with 5% nonfat dried milk in physiological saline buffer for 4 hrs with shaking. The  
65 membrane was incubated with the primary His-tag monoclonal antibody (anti-mouse cat. No.  
66 70796-3 diluted 1:1000 (Novagen-EMD Millipore) in 5% blocking buffer for 1 hrs at room  
67 temperature. The membrane was washed four times with the same buffer containing 0.05%  
68 Tween 20 for 25 min for each time. The membrane was then incubated with secondary  
69 antibody (peroxidase-coupled anti-mouse IgG, Sigma Chemical Co.) diluted 1:5000 for 1 hrs  
70 at room temperature and washed with the same buffer 4 times for 25 min each time. The  
71 proteins were detected using a Western Lightning<sup>TM</sup> Ultra chemiluminescent substrate kit  
72 (ECL Kit, 2 ml/membrane). In a separate tube, the solutions were mixed in a 1:1 ratio and  
73 poured onto the membrane for 1 min before exposure.

74 Lane 1, Standard protein markers. Lane 2, vector plasmid pET28a in BL21(DE3), Lane 3,  
75 vector plasmid pBAM1 in *P. putida*. Lane 4, *arsM* in plasmid pET28a expressed in BL21(DE3)  
76 with IPTG. Lane 5, *arsM* chromosomally expressed in *P. putida*.

Fig. 1S\_A

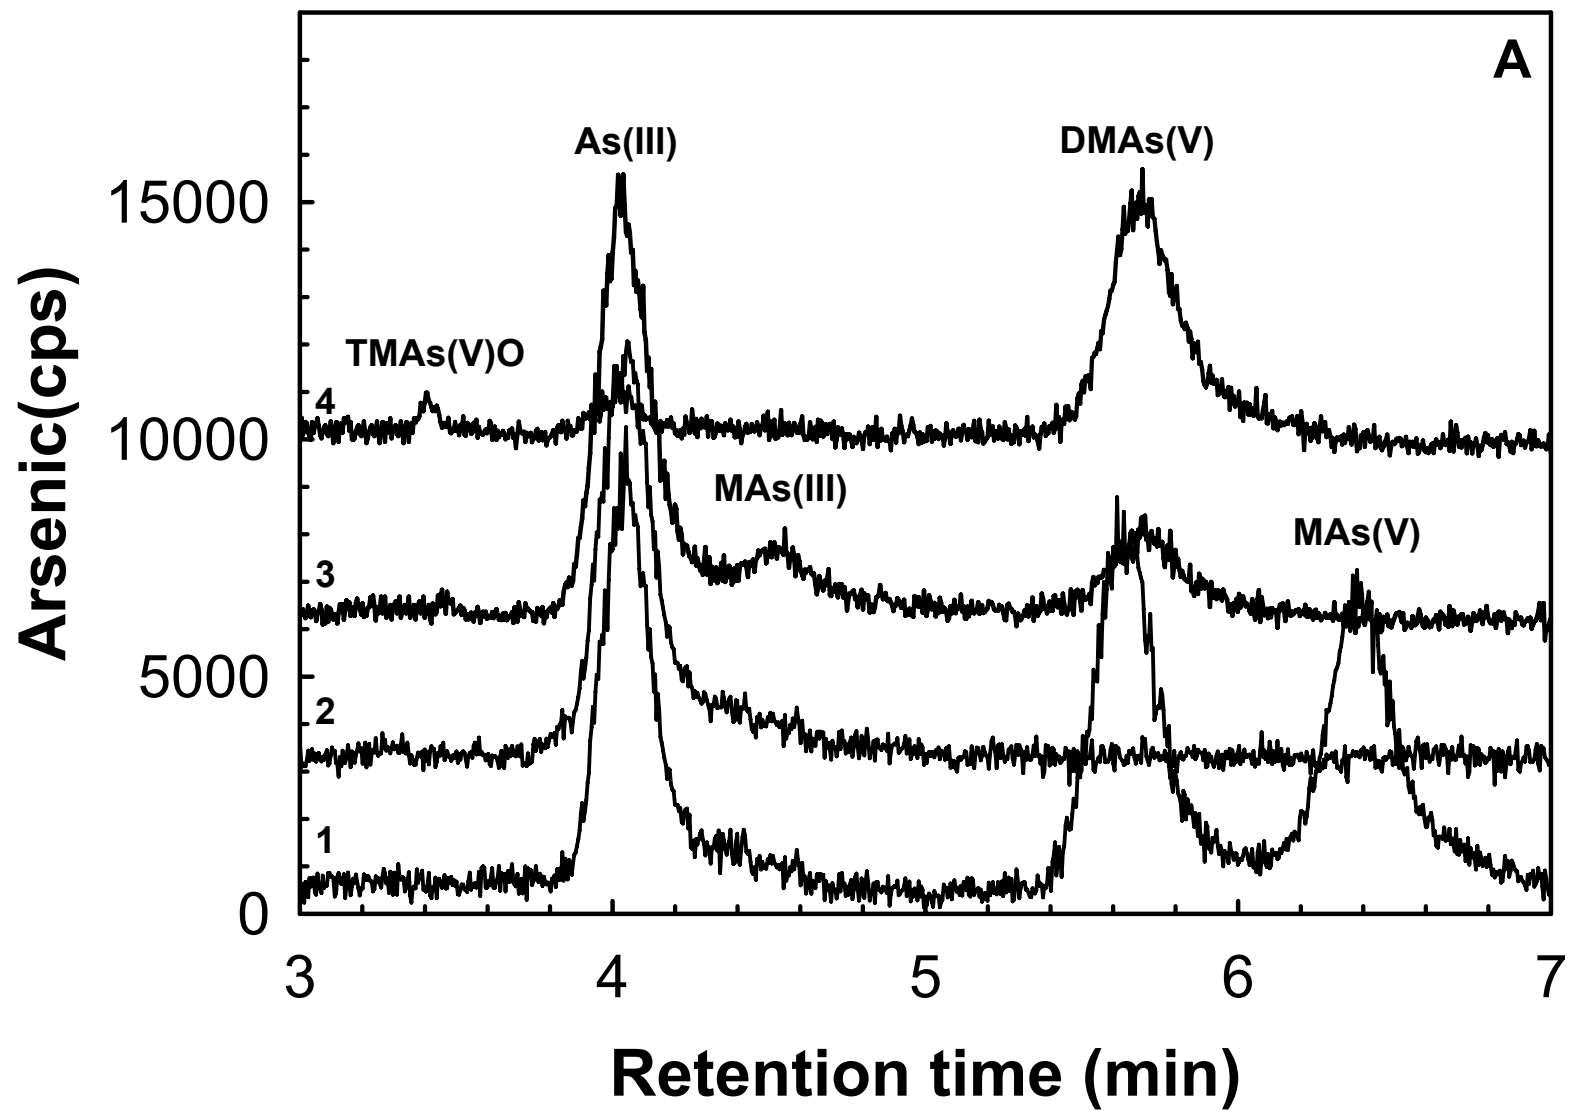

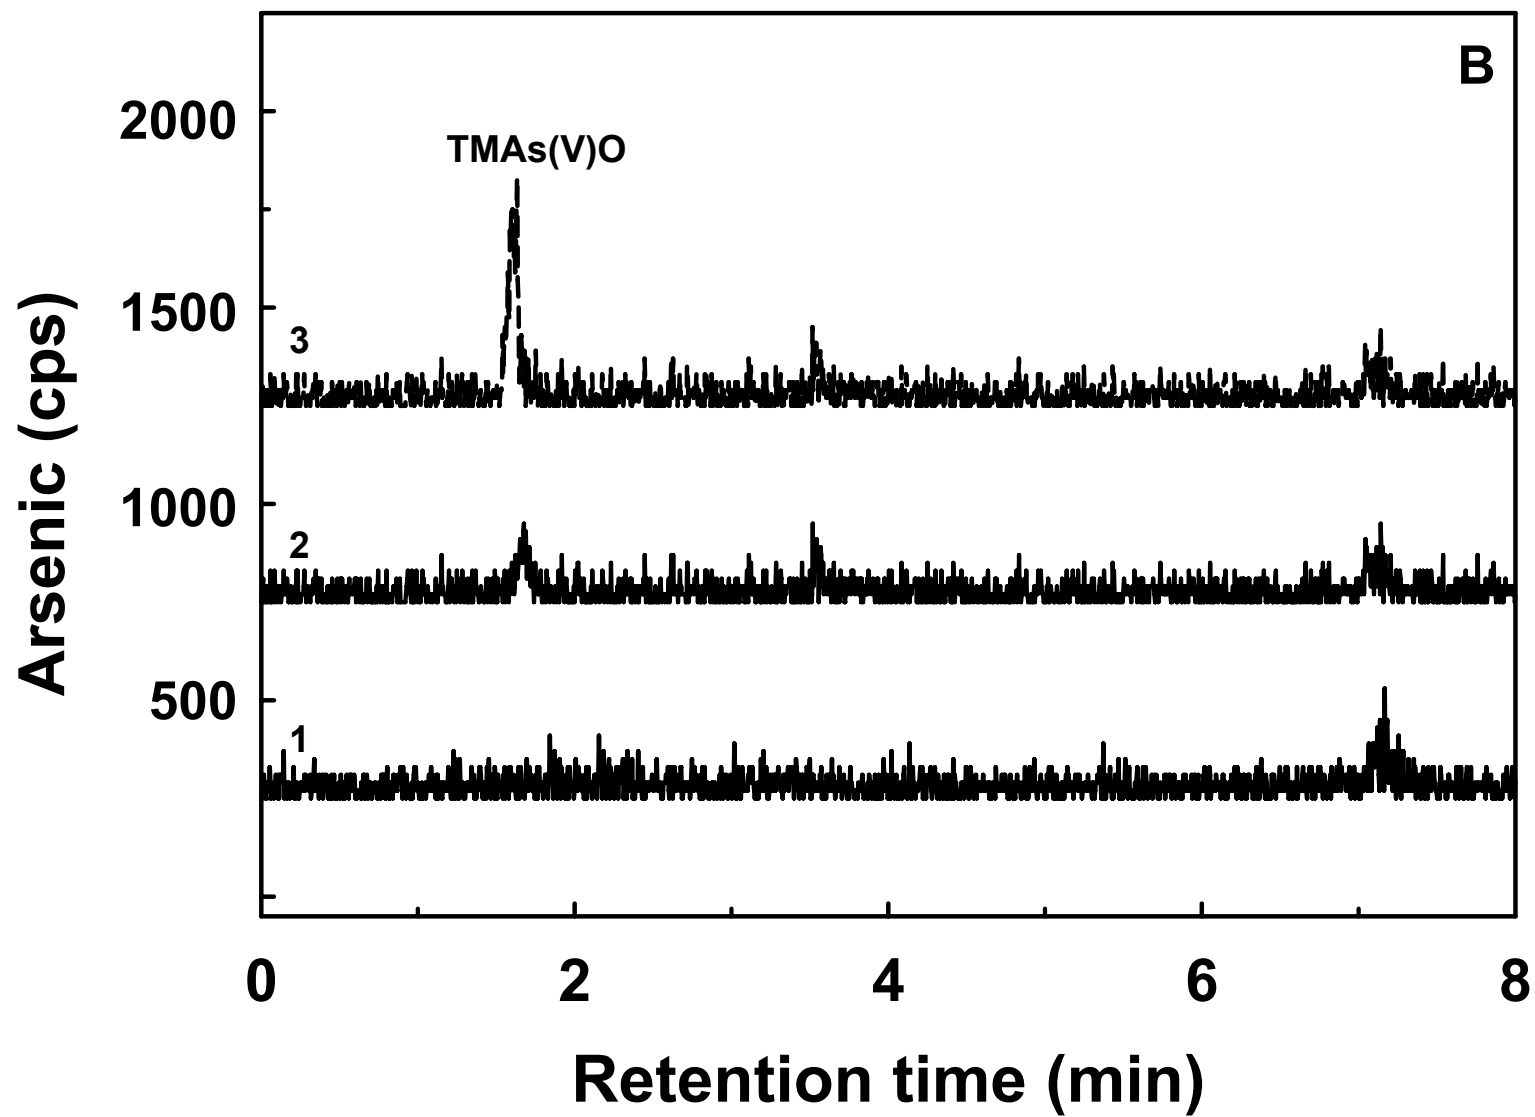

Fig. 2S

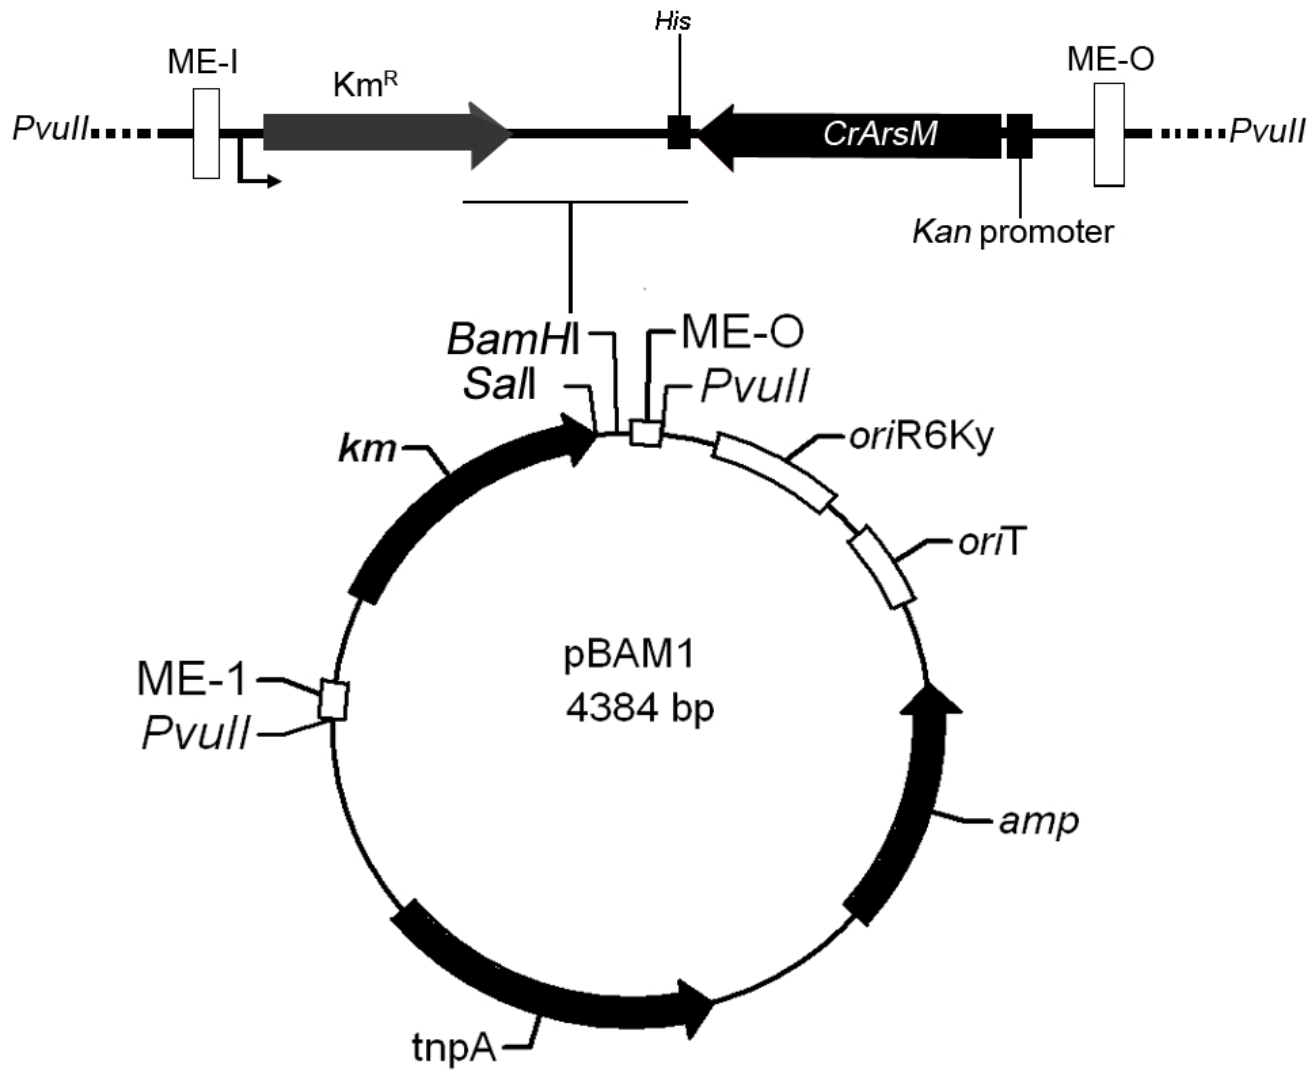

Fig. 3S

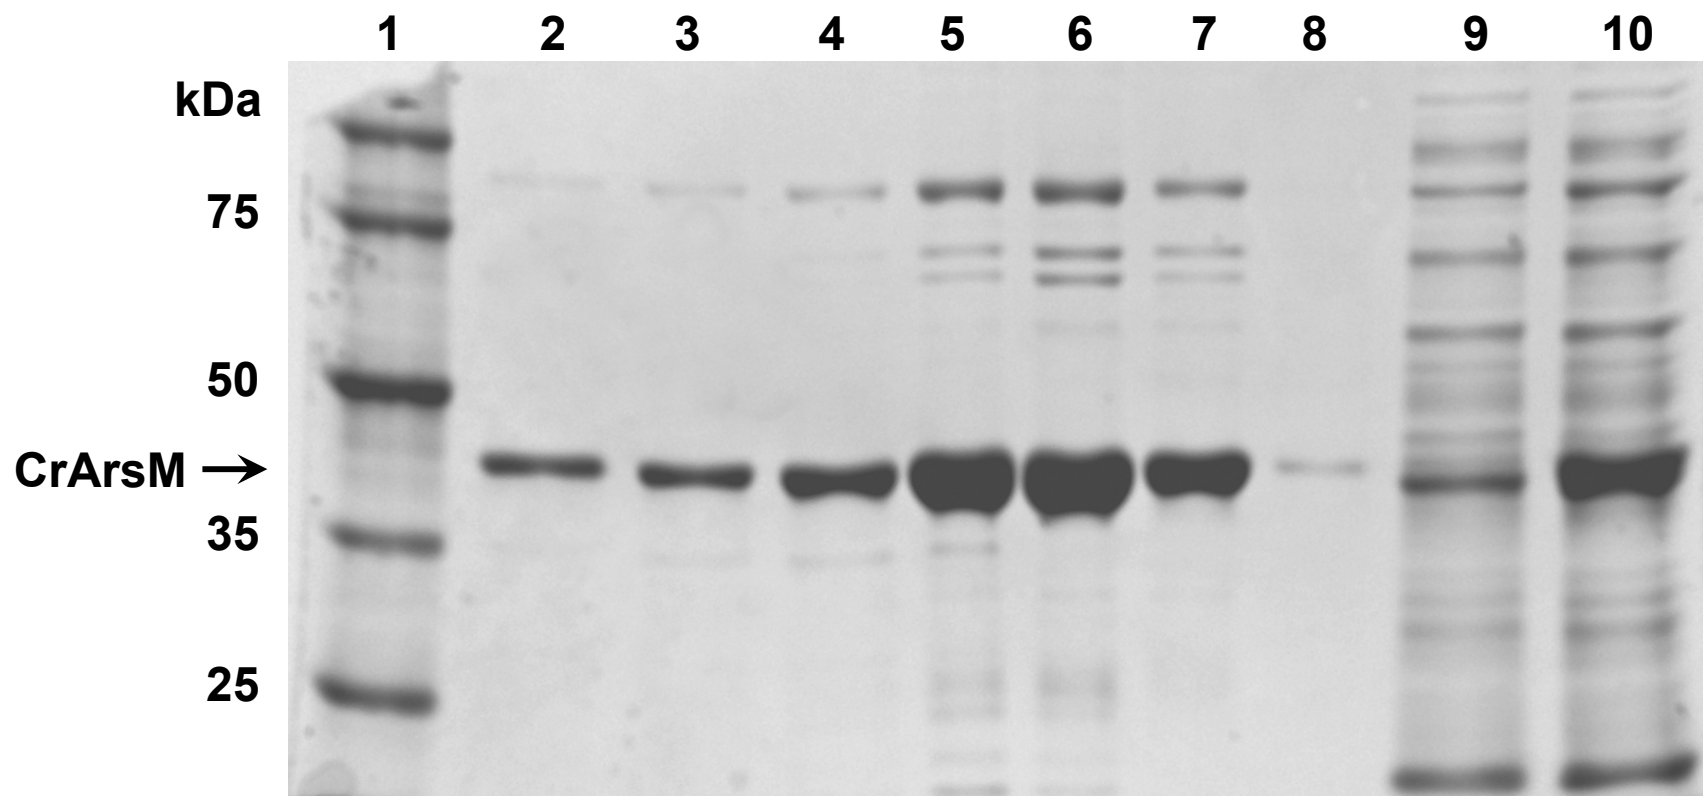



Fig. 4S

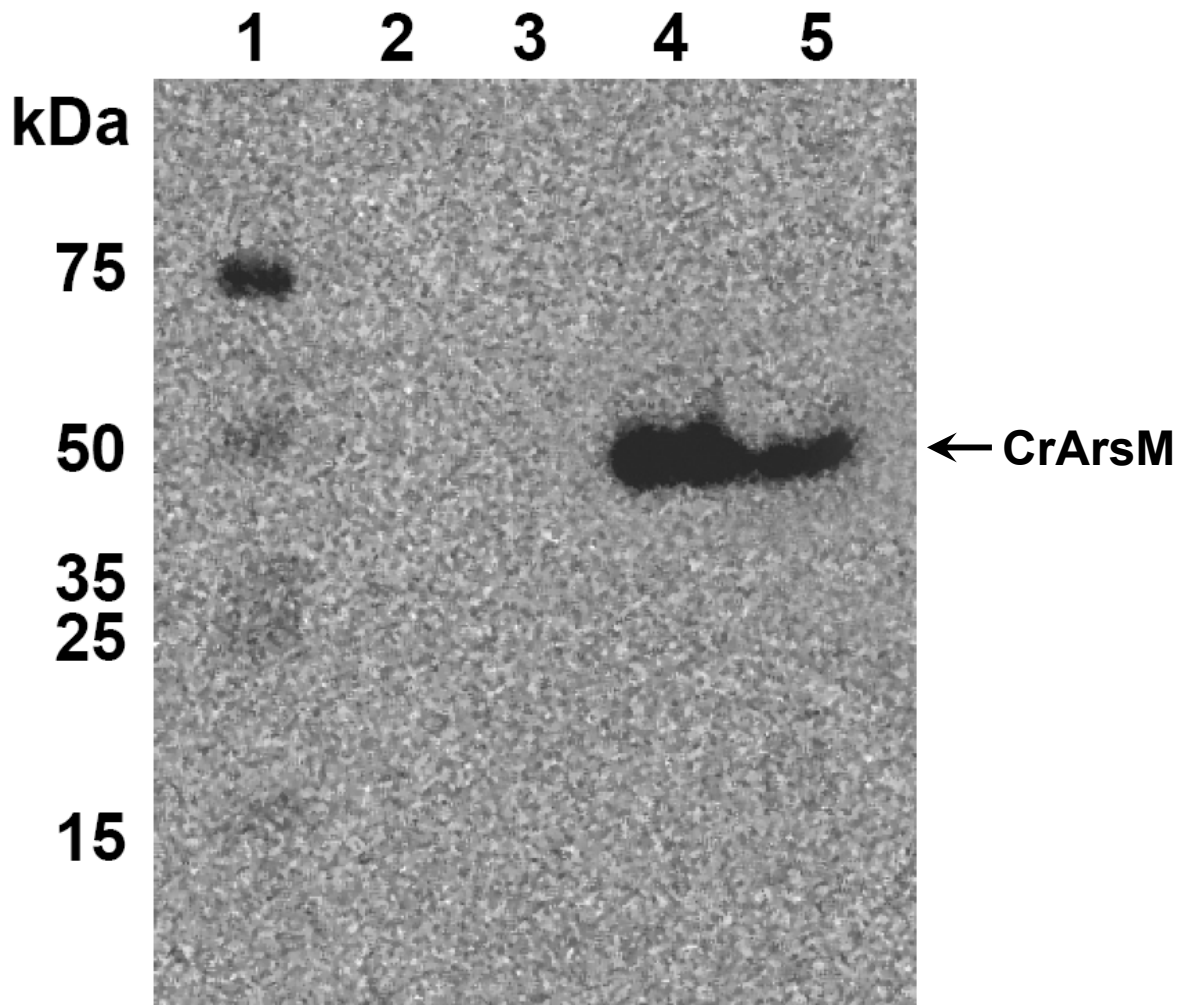

Supplement: AEM.01133-13_zam999104513so1.pdf [file AEM.01133-13_zam999104513so1.pdf]
